# Supplementary material for: Junction studies on electrochemically fabricated p–n Cu2O homojunction solar cells for efficiency enhancement
Source: Royal Society of Chemistry journal article supplement (doi:10.1039/c2cp40502d), 2012-01-01
Supplement: c2cp40502d.pdf [file c2cp40502d.pdf]

# **Junction Studies on Electrochemically Fabricated p-n Cu<sub>2</sub>O Homojunction Solar Cells for Efficiency Enhancement**

*Colleen M. McShane and Kyoung-Shin Choi\**

Department of Chemistry, Purdue University, West Lafayette, IN 47907, USA

## **Electronic Supplementary Information**

\* To whom correspondence should be addressed. Email: [kchoi1@purdue.edu](mailto:kchoi1@purdue.edu); Tel: 1-765-494-0049; Fax: 1-765-494-0239.

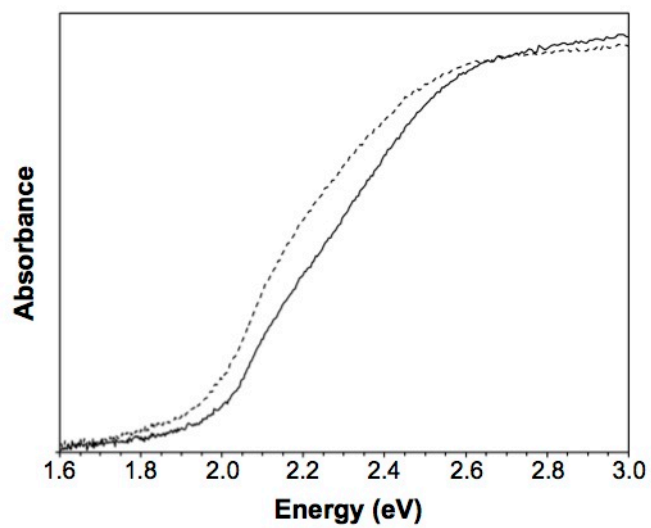

**Figure S1.** UV-vis spectra of p-Cu<sub>2</sub>O (solid) and n-Cu<sub>2</sub>O (dashed) used in this study. Both p- and n-Cu<sub>2</sub>O show similar absorption features and have band gaps *ca.* 2 eV.
